# Supplementary material for: Biomolecular interfaces based on self-assembly and self-recognition form biosensors capable of recording molecular binding and release
Source: Royal Society of Chemistry journal article supplement (doi:10.1039/c8nr10090j), 2019-01-01
Supplement: c8nr10090j1.pdf [file c8nr10090j1.pdf]

**Biomolecular interfaces based on self-assembly and self-  
recognition form biosensors capable to record single molecule  
binding and release**

**Xiao Hu<sup>1</sup>, Anthony Guiseppi-Elie<sup>2</sup>, and Cerasela Zoica Dinu<sup>1\*</sup>**

<sup>1</sup>Department of Chemical and Biomedical Engineering, West Virginia University,  
WV, USA

<sup>2</sup>Department of Biomedical Engineering, Texas A&M University College of  
Engineering, TX, USA

**\*Corresponding author:**

Cerasela Zoica Dinu, Ph.D.  
Department of Chemical and Biomedical Engineering  
West Virginia University  
Benjamin M. Statler College of Engineering and Mineral Resources  
PO Box 6102  
Morgantown, WV, 26506, USA  
E-mail: [cerasela-zoica.dinu@mail.wvu.edu](mailto:cerasela-zoica.dinu@mail.wvu.edu)  
Tel.: +1 304 293 9338  
  
Fax: +1 304 293 4139

**Supporting Information S1: The sequence of kinesin 1 (simply called kinesin) heavy chain**

The sequence was imported from previous research<sup>1</sup>.

10            20            30            40            50  
MADLAECNIK VMCRFRPLNE SEVNRGDKYI AKFQGEDTVV IASKPYAFDR  
60            70            80            90            100  
VFQSSTSQEQ VYNDCAKKIV KDVLEGYNGT IFAYGQTSSG KTHTMEGKLH  
110           120           130           140           150  
DPEGMGIIPR IVQDIFNYIY SMDENLEFHI KVSYFEIYLD KIRDLLDVSK  
160           170           180           190           200  
TNLSVHEDKN    RVPYVKGCTE    RFVCSPEVM    DTIDEGKSNR  
HVAVTNMNEH  
210           220           230           240           250  
SSRSHSIFLI NVKQENTQTE QKLSGKLYLV DLAGSEKVSF TGAEGAVLDE  
260           270           280           290           300  
AKNINKSLSA LGNVISALAE GSTYVPYRDS KMTRILQDSL GGNCRTTIVI  
310           320           330           340           350  
CCSPSSYNES ETKSTLLFGQ RAKTIKNTVC VNVELTAEQW KKKYEKEKEK  
360           370           380           390           400  
NKILRNTIQW LENELNRWRN GETVPIDEQF DKEKANLEAF TVDKDITLTN  
410           420           430           440           450  
DKPATAIGVI GNFTDAERRK CEEIYAKLYK QLDDKDEEIN QSQLVEKLLK  
460           470           480           490           500  
TQMLDQEELL    ASTRRDQDNM    QAELNRLQAE    NDASKEEVKE  
VLQALEELAV  
510           520           530           540           550  
NYDQKSQEVE DKTKEYELLS DELNQKSATL ASIDAELQKL KEMTNHQKRR  
560           570           580           590           600  
AAEMMASLLK DLAEIGIavg NNDVKQPEGT GMIDEEFTVA RLYISKMKSE

|                                                         |            |            |            |     |
|---------------------------------------------------------|------------|------------|------------|-----|
| 610                                                     | 620        | 630        | 640        | 650 |
| VKTMVKRCKQ LESTQTESNK KMEENEKELA ACQLRISQHE AKIKSLTEYL  |            |            |            |     |
| 660                                                     | 670        | 680        | 690        | 700 |
| QNVEQKKRQL                                              | EESVDALSEE | LVQLRAQEKV | HEMEKEHLNK |     |
| VQTANEVKQA                                              |            |            |            |     |
| 710                                                     | 720        | 730        | 740        | 750 |
| VEQQIQSHRE THQKQISSLR DEVEAKAKLI TDLQDQNQKM MLEQERLRVE  |            |            |            |     |
| 760                                                     | 770        | 780        | 790        | 800 |
| HEKLNKATDQE                                             | KSRKLHELTV | MQDRREQARQ | DLKGLEETVA |     |
| KELQTLHNLN                                              |            |            |            |     |
| 810                                                     | 820        | 830        | 840        | 850 |
| KLFVQDLATR VKKSAEIDSD DTGGSAAQKQ KISFLENNLE QLTKVHKQLV  |            |            |            |     |
| 860                                                     | 870        | 880        | 890        | 900 |
| RDNADLRCEL PKLEKRLRAT AERVKALESA LKEAKENASR DRKRYQQEVD  |            |            |            |     |
| 910                                                     | 920        | 930        | 940        | 950 |
| RIKEAVRSKN MARRGHTSAQI AKPIRPGQHP AASPTHPSAI RGGGAFVQNS |            |            |            |     |
| 960                                                     |            |            |            |     |
| QPVAVRGGGG KQV                                          |            |            |            |     |

### Supporting Information S2: Loading of the redox agent onto the kinesin

Kinesin was expressed as described in the manuscript's Materials and Methods<sup>2</sup>. Ferrocene monocarboxylic acid-kinesin conjugates were prepared by dissolving 4 mg ferrocene monocarboxylic acid (FCA, Fisher Scientific, USA) in 800  $\mu$ L of BRB80 buffer (formed from a mixture of 80 mM piperazine-N,N'-bis(2-ethanesulfonic acid buffer, 1 mM MgCl<sub>2</sub> and 1 mM ethylene glycol tetraacetic acid (EGTA), pH 6.8; all reagents were purchased from Fisher Scientific, USA) which contained 5 mM biotin-sulfo-N-Hydroxy succinimide (biotin-sulfo-NHS, Sigma, USA), 2 mM 1-Ethyl-3-(3'-dimethylaminopropyl) carbodiimide (EDC, Fisher Scientific, USA) and 10  $\mu$ M taxol (Fisher Scientific, USA). The mixture was subsequently incubated for 15 min at room temperature. Upon incubation, 90  $\mu$ L of 2.8 mg/mL kinesin was mixed with the FCA solution and incubated for 4 h at 4 °C; the reaction was terminated by adding  $\beta$ -mercaptoethanol (Fisher Scientific, USA, 20 mM final concentration)<sup>3</sup>.

Loading of the FCA onto the kinesin was estimated by subtracting the amount of the free FCA in the supernatant of span down FCA-kinesin conjugates from the total FCA being added in the reaction. Specifically, after the FCA-kinesin conjugates were synthesized as described above, the FCA-kinesin conjugates were span at 30,000 rpm for 10 min using an Allegra 64R centrifuge (Beckman Coulter, USA). After the centrifugation, the supernatant was collected and evaluated using fluorescence microscopy (Nikon, USA). The pellet was mixed with BRB80 again and the centrifugation was repeated until there was no kinesin visible in the fluorescence microscopy. The concentration of the free FCA in the supernatant was also evaluated using the electrochemical workstation and a user-performed calibration curve (**Figure S1**).

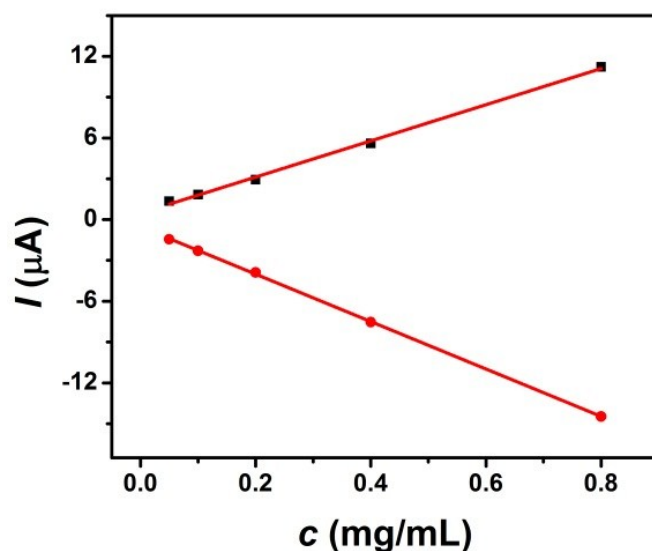

**Figure S1: The calibration curve of FCA.**

### **Supporting Information S3: Theoretical evaluation of FCA-kinesin conjugates Immobilized at the user-functionalized electrode interface**

Calculations considered the total length of a MT ( $L_{MT}$ ) as being the overall electrode area ( $3.14 \text{ mm}^2$ ) divided by an individual MT diameter (i.e.,  $d=25 \text{ nm}^4$ ) as well as that kinesin molecules binding area is about  $8 \text{ nm}$  at a MT individual binding site<sup>5</sup>. Maximum theoretical numbers of FCA-kinesin conjugates ( $N_{FCA-kinesin-max}$ ) on the electrode was thus calculated using:

$$N_{FCA-Kinesin-max} = \frac{L_{MT}}{8nm}$$

The full area of the electrode was defined as  $A_E$ .

$$A_E = \pi(0.5d)^2 = 3.14 \times (0.5 \times 0.02)^2 = 3.14 \times 10^{-4} \text{ m}^2$$

The area that the microtubule occupied on the electrode defined as  $A_{MT}$  equaled its cross-section area ( $A_{MT-cross}$ ). When the MT formed a monolayer on the electrode it was considered that full surface area of the electrode ( $A_{MT} = A_E$ ) was occupied. The length of the microtubule was calculated using the area of the gold electrode divided by the diameter of the microtubule.

$$L_{MT} = \frac{A_{MT}}{d_{MT}} = \frac{A_E}{d_{MT}} = \frac{3.14 \times 10^{-4} m^2}{25 \times 10^{-9} m} = 1.256 \times 10^4 m$$

$$N_{FCA-Kinesin-max} = \frac{L_{MT}}{8nm} = \frac{1.256 \times 10^4 m}{8 \times 10^{-9} m} = 1.57 \times 10^{12}$$

**Supporting Information S4: CV of FCA-kinesin conjugate at the modified electrode before adding ATP.**

FCA-kinesin conjugates functionalized gold electrode scanned for 20 cycles with scanning being stopped for 20 sec after finishing each such cycle showed that the peak currents did not change from the first to the last cycle when no ATP was present in solution thus indicating that the number of the immobilized kinesin-FCA conjugates did not change over time (**Figure S2**).

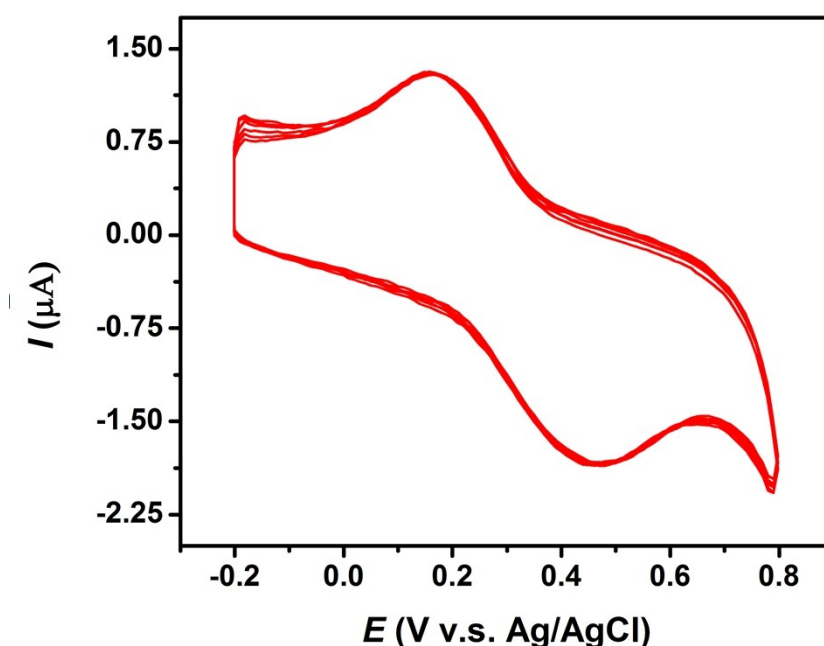

**Figure S2:** CV of FCA-kinesin conjugate at the modified electrode (Au/MUA /Anti-tubulin Antibody/MT) before adding 250  $\mu$ M ATP.

**Supporting Information S5: CV of FCA-kinesin conjugate at the modified electrode before adding ATP.**

FCA-kinesin conjugates dissociation was triggered by the addition of different concentrations of ATP, i.e., 2.5  $\mu\text{M}$ , 250  $\mu\text{M}$  and 2.5 mM respectively. CV analysis performed for a total 10 CV cycles, with the scanning being stopped for 20 sec after finishing each such cycle, are included below (Figure S3). Briefly, the peak current went down with the ATP concentration thus supporting the hypothesis that the binding and unbinding could be specifically controlled by changes in the chemical energy provided to the functional biosensor. This is also supported by previous analysis<sup>6</sup> that has showed that controlling ATP concentrations could lead to differences in the kinesin speed ( from 10 nm/s for 1  $\mu\text{M}$  to 550 nm/s for 1000  $\mu\text{M}$  for instance) and thus its subsequent dissociation when encountering the end of a microtubule track.

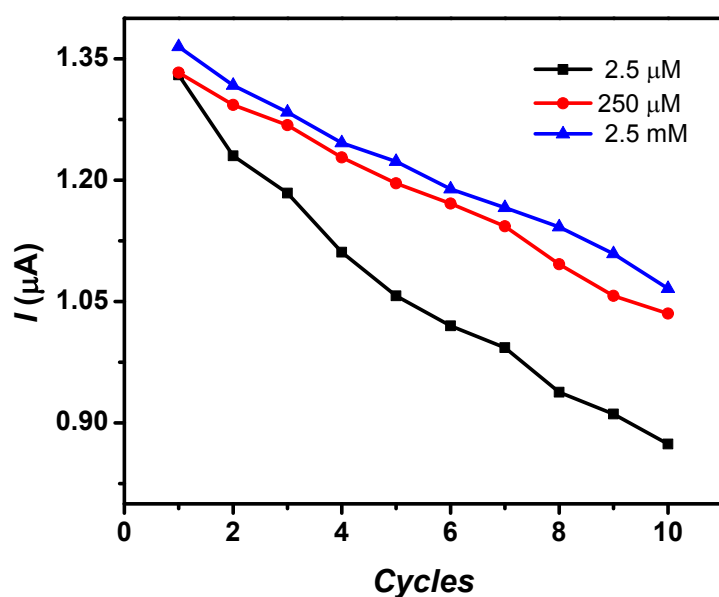

**Figure S3** Relationship between peak currents of FCA-kinesin conjugates and CV cycles as measured on a modified electrode and in BRB80 buffer (pH 6.8) containing 10 mM taxol. For such analysis, different concentrations of ATP were used, namely 2.5  $\mu\text{M}$ , 250  $\mu\text{M}$  and 2.5 mM respectively.

## References:

1. Kull, F. J.; Sablin, E. P.; Lau, R.; Fletterick, R. J.; Vale, R. D., Crystal structure of the kinesin motor domain reveals a structural similarity to myosin. *Nature* **1996**, *380* (6574), 550.
2. Hu, X.; Fagone, P.; Dong, C.; Su, R.; Xu, Q.; Dinu, C. Z., Biological self-assembly and recognition used to synthesize and surface guide next generation of hybrid materials. *ACS applied materials & interfaces* **2018**, *10* (34), 28372-28381.
3. Landers, T. A.; Greenberg, H. B.; Robinson, W. S., Structure of hepatitis B Dane particle DNA and nature of the endogenous DNA polymerase reaction. *Journal of virology* **1977**, *23* (2), 368-376.
4. Carlson, L.-A.; Shen, Q.-T.; Pavlin, M. R.; Hurley, J. H., ESCRT filaments as spiral springs. *Developmental cell* **2015**, *35* (4), 397-398.
5. Dong, C.; Dinu, C. Z., Molecular trucks and complementary tracks for bionanotechnological applications. *Current opinion in biotechnology* **2013**, *24* (4), 612-619.
6. Asenjo, A. B.; Sosa, H., A mobile kinesin-head intermediate during the ATP-waiting state. *Proceedings of the National Academy of Sciences* **2009**, *106* (14), 5657-5662.
